# Supplementary material
Source: MDPI journal article supplement (https://www.mdpi.com/2071-1050/16/2/601)
Supplement: s1 [file s1]

**Supplementary Material S1.**  $2^3$  design matrix with experimental results of mass yield for  $\text{ZnCl}_2$ -doped biomass (1:2 w w<sup>-1</sup>) after pyrolysis and washing process.

| Run | Factors |   |   | Yield (%)      |                |           |
|-----|---------|---|---|----------------|----------------|-----------|
|     | A       | B | C | y <sub>1</sub> | y <sub>2</sub> | $\bar{y}$ |
| 1   | -       | - | - | 47.1           | 44.6           | 45.6      |
| 2   | +       | - | - | 47.1           | 47.6           | 47.4      |
| 3   | -       | + | - | 42.9           | 44.8           | 43.9      |
| 4   | +       | + | - | 41.2           | 46.3           | 43.8      |
| 5   | -       | - | + | 49.4           | 47.6           | 48.5      |
| 6   | +       | - | + | 49.9           | 46.4           | 48.2      |
| 7   | -       | + | + | 40.3           | 42.3           | 41.3      |
| 8   | +       | + | + | 41.0           | 40.1           | 40.6      |

Note: A: impregnation time; B: final carbonization temperature; C: heating rate.

**Supplementary Material S2.**  $2^3$  factorial design analysis of variance (ANOVA) for mass yield of  $\text{ZnCl}_2$ -doped black wattle biochar (1:2 w w<sup>-1</sup>) after pyrolysis and washing process. SS: sum of squares; df: degrees of freedom; MS: mean square ( $R^2 = 0.81881$ ; adj.  $R^2 = 0.69801$ ).

| Source      | SS       | df | MS       | F-value  | p-value  |
|-------------|----------|----|----------|----------|----------|
| A           | 0.0225   | 1  | 0.0225   | 0.00638  | 0.938295 |
| B           | 104.0400 | 1  | 104.0400 | 29.50443 | 0.000622 |
| C           | 1.3225   | 1  | 1.3225   | 0.37504  | 0.557269 |
| A × B       | 1.0000   | 1  | 1.0000   | 0.28359  | 0.608828 |
| A × C       | 1.5625   | 1  | 1.5625   | 0.44311  | 0.524352 |
| B × C       | 21.1600  | 1  | 21.1600  | 6.00071  | 0.039960 |
| Lack of Fit | 0.3600   | 1  | 0.3600   | 0.10209  | 0.757518 |
| Pure Error  | 28.2100  | 8  | 3.5263   |          |          |
| Total SS    | 157.6775 | 15 |          |          |          |

Note: A: impregnation time; B: final carbonization temperature; C: heating rate.

**Supplementary Material S3.**  $2^3$  design matrix with experimental results of specific surface area ( $A_{BET}$ ), total pore volume ( $V_p$ ), and average pore diameter ( $D_p$ ) for ZnCl<sub>2</sub>-doped biomass (1:2 w w<sup>-1</sup>) after pyrolysis and washing process.

| Run | Factors |   |   | $A_{BET}$<br>(m <sup>2</sup> g <sup>-1</sup> ) |             |                      | $V_p$<br>(cm <sup>3</sup> g <sup>-1</sup> ) |           | $D_p$<br>(nm)    |                  |
|-----|---------|---|---|------------------------------------------------|-------------|----------------------|---------------------------------------------|-----------|------------------|------------------|
|     | A       | B | C | $A_{BET,1}$                                    | $A_{BET,2}$ | $\overline{A_{BET}}$ | $V_{p,1}$                                   | $V_{p,2}$ | $\overline{V_p}$ | $\overline{D_p}$ |
| 1   | -       | - | - | 805.7                                          | 743         | 774                  | 0.52                                        | 0.36      | 0.44             | 1.29             |
| 2   | +       | - | - | 1301.4                                         | 765.3       | 1033.4               | 1.02                                        | 0.38      | 0.70             | 1.57             |
| 3   | -       | + | - | 1524.8                                         | 1549        | 1537                 | 1.01                                        | 0.76      | 0.89             | 1.32             |
| 4   | +       | + | - | 1146.8                                         | 1499.5      | 1323.2               | 0.73                                        | 0.73      | 0.73             | 1.27             |
| 5   | -       | - | + | 700.6                                          | 841.7       | 771.2                | 0.45                                        | 0.42      | 0.44             | 1.29             |
| 6   | +       | - | + | 528.6                                          | 585.9       | 557.3                | 0.48                                        | 0.28      | 0.38             | 1.81             |
| 7   | -       | + | + | 1477.2                                         | 1538        | 1508                 | 1.04                                        | 0.74      | 0.89             | 1.41             |
| 8   | +       | + | + | 1346.2                                         | 1481.5      | 1413.9               | 1                                           | 0.72      | 0.9              | 1.5              |

Note: A: impregnation time; B: final carbonization temperature; C: heating rate.

**Supplementary Material S4.**  $2^3$  design matrix with experimental results of BET analysis for commercial activated carbon (CAC) and biochar samples doped with ZnCl<sub>2</sub> in 1:1 ratio (w w<sup>-1</sup>) after pyrolysis and washing process.

| Run | Factors |      |      | $A_{BET}$ (m <sup>2</sup> g <sup>-1</sup> ) | $V_p$ (cm <sup>3</sup> g <sup>-1</sup> ) | $D_p$ (nm) |
|-----|---------|------|------|---------------------------------------------|------------------------------------------|------------|
|     | A       | B    | C    |                                             |                                          |            |
| 3   | -       | +    | -    | 1119.2                                      | 0.55                                     | n.d.       |
| 4   | +       | +    | -    | 1254.0                                      | 0.62                                     | 1.9        |
| 7   | -       | +    | +    | 950.4                                       | 0.52                                     | 2.2        |
| 8   | +       | +    | +    | 1189.8                                      | 0.59                                     | n.d.       |
| CAC | n.a.    | n.a. | n.a. | 595.2                                       | 0.24                                     | 1.6        |

Note: n.d.: not determined; n.a.: not applicable; A: impregnation time; B: final carbonization temperature; C: heating rate.

**Supplementary Material S5.**  $2^3$  design matrix with experimental results of EPR analysis for the biochar samples doped with  $\text{ZnCl}_2$  in 1:2 ratio (w w<sup>-1</sup>) after pyrolysis and washing process.

| Run | Factors |   |   | g-factor | $\Delta H_{pp}$<br>(G) | $N$<br>(spin g <sup>-1</sup> ) |
|-----|---------|---|---|----------|------------------------|--------------------------------|
|     | A       | B | C |          |                        |                                |
| 1   | -       | - | - | 20.030   | 21                     | $7.71 \times 10^{18}$          |
| 2   | +       | - | - | 20.030   | 31                     | $4.30 \times 10^{18}$          |
| 3   | -       | + | - | 20.030   | 152                    | $5.29 \times 10^{16}$          |
| 4   | +       | + | - | 20.030   | 162                    | $2.20 \times 10^{17}$          |
| 5   | -       | - | + | 20.031   | 14                     | $2.28 \times 10^{19}$          |
| 6   | +       | - | + | 20.031   | 21                     | $3.15 \times 10^{19}$          |
| 7   | -       | + | + | 20.034   | 136                    | $2.89 \times 10^{17}$          |
| 8   | +       | + | + | 20.034   | 138                    | $2.79 \times 10^{17}$          |
